1                   **Genomic characterisation and context of the *bla*<sub>NDM-1</sub> carbapenemase in**

2                                   ***Escherichia coli* ST101.**

3     Melinda M. Ashcroft<sup>1,2,3\*</sup>, Brian M. Forde<sup>1,2,3</sup>, Minh-Duy Phan<sup>1,2</sup>, Kate M. Peters<sup>1,2</sup>, Andrew  
4     Henderson<sup>4,5,2</sup>, Steven J. Hancock<sup>1,2</sup>, Leah W. Roberts<sup>1,2,3</sup>, Kok-Gan Chan<sup>6,7</sup>, Teik Min Chong<sup>6</sup>, Wai-  
5     Fong Yin<sup>6</sup>, David L. Paterson<sup>2,4</sup>, Timothy R. Walsh<sup>8</sup>, Mark A. Schembri<sup>1,2</sup>, Scott A. Beatson<sup>1,2,3\*</sup>

6  
7     <sup>1</sup>School of Chemistry and Molecular Biosciences, The University of Queensland, Brisbane, QLD,  
8     Australia.

9     <sup>2</sup>Australian Infectious Diseases Research Centre, The University of Queensland, Brisbane, QLD,  
10    Australia.

11    <sup>3</sup>Australian Centre for Ecogenomics, The University of Queensland, Brisbane, QLD, Australia.

12    <sup>4</sup>UQ Centre for Clinical Research, The University of Queensland, Brisbane, QLD, Australia.

13    <sup>5</sup>Infection Management Services, Princess Alexandra Hospital, Brisbane, QLD, Australia

14    <sup>6</sup>Division of Genetics and Molecular Biology, Institute of Biological Sciences, Faculty of Science,  
15    University of Malaya, Kuala Lumpur, Malaysia.

16    <sup>7</sup>International Genome Centre, Jiangsu University, Zhenjiang, China.

17    <sup>8</sup>Department of Medical Microbiology and Infectious Disease, Cardiff University, Cardiff, United  
18    Kingdom.

19  
20    \* **Corresponding authors:**

21    Scott A. Beatson, Australian Centre for Ecogenomics, School of Chemistry and Molecular  
22    Biosciences, The University of Queensland, Brisbane 4072, QLD, Australia;

23    Telephone: +61-7-33654863; Email: [s.beatson@uq.edu.au](mailto:s.beatson@uq.edu.au)

24    **OR**

25 Melinda M. Ashcroft, affiliation is now: The Department of Immunology and Microbiology, The  
26 Peter Doherty Institute for Infection and Immunity, The University of Melbourne, Melbourne, VIC,  
27 3000. Telephone: +61-3-83443353; Email: [melinda.ashcroft@unimelb.edu.au](mailto:melinda.ashcroft@unimelb.edu.au)

28

29 **Keywords:**

30 antimicrobial resistance; long-read sequencing; plasmid; carbapenem resistance; NDM-1

31 **Word count (main text): 5592 (including in-text citations)**

32

33

34

35

36

37

38

39

40

41

42

43

44

45

46

47

48 **Abstract**

49 Carbapenems are last-resort antibiotics; however, the spread of plasmid-encoded carbapenemases  
50 such as the New Delhi metallo- $\beta$ -lactamase 1 (NDM-1) challenges their effectiveness. The rise of  
51 NDM-1 has coincided with the emergence of extensively multidrug resistant (MDR) lineages such as  
52 *Escherichia coli* ST101. Here we present a comprehensive genomic analysis of seven *E. coli* ST101  
53 isolates that carry the *bla*<sub>NDM-1</sub> gene. We determined the complete genomes of two isolates and the  
54 draft genomes of five isolates, enabling complete resolution of the plasmid context of *bla*<sub>NDM-1</sub>.  
55 Comparisons with thirteen previously published ST101 genomes revealed a monophyletic lineage  
56 within the B1 phylogroup forming two clades (designated Clade 1 and Clade 2). Most Clade 1 strains  
57 are MDR, encoding resistance to at least 9 different antimicrobial classes, including extended  
58 spectrum cephalosporins (ESCs). Additionally, we characterised different pathways for *bla*<sub>NDM-1</sub>  
59 carriage and persistence in the ST101 lineage. For IncC plasmids, carriage was associated with  
60 recombination and local transposition events within the antibiotic resistance island (ARI-A). In  
61 contrast, we revealed recent transfer of a large *bla*<sub>NDM-1</sub> resistance island between F-type plasmids.  
62 The complex acquisition pathways characterised here highlight the benefits of long-read SMRT  
63 sequencing in revealing evolutionary events that would not be apparent by short-read sequencing  
64 alone. These high-quality *E. coli* ST101 genomes will provide an important reference for further  
65 analysis of the role of MGEs in this emerging MDR lineage.

66

67 **Abstract word count: 224**

68

## 69 Introduction

70 The successful treatment of *E. coli* infections is complicated by the rising prevalence of antibiotic  
71 resistance among clinical and community isolates (Poolman and Wacker 2016). Carbapenems are  
72 considered a class of last-resort antibiotics, however their effectiveness has been challenged by the  
73 emergence of bacteria capable of hydrolysing carbapenems and most  $\beta$ -lactams. Carbapenem  
74 resistance has disseminated worldwide, as genes that encode carbapenemases are easily  
75 transferred via MGEs such as plasmids, transposons and integrons. In 2008, *bla*<sub>NDM-1</sub> was first  
76 reported in a *Klebsiella pneumoniae* strain isolated from a Swedish patient who had recently  
77 travelled to India (Yong et al. 2009). Since then, the *bla*<sub>NDM-1</sub> gene and its variants has been identified  
78 in Gram-negative bacteria in more than fifty countries including the UK, India, Pakistan and  
79 Bangladesh, across Europe, China, the US, Canada and Australia (Nordmann et al. 2011). NDM-  
80 positive clonal lineages can be found in multiple different organisms including *K. pneumoniae*,  
81 *Acinetobacter baumannii* and *E. coli* (Peirano et al. 2013). For example, in *K. pneumoniae*, several of  
82 the first *bla*<sub>NDM-1</sub> reports between 2009-2011 involved the multi-drug resistant (MDR) sequence type  
83 (ST)14 clone (Woodford et al. 2011). In *A. baumannii*, international clonal lineages I (Clonal Complex  
84 (CC)109/CC1) and II (CC92/CC2), ST25 and ST85 are the four dominant NDM-positive clonal lineages  
85 (Zarrilli et al. 2013). In *E. coli*, *bla*<sub>NDM-1</sub> has been detected worldwide, with isolates frequently typed  
86 as ST405, ST131 and ST101 (Peirano et al. 2013) and also found to carry the *bla*<sub>CTX-M-15</sub> ESBL gene  
87 (Coque et al. 2008). The first characterisation of an FII plasmid carrying the *bla*<sub>NDM-1</sub> gene was the  
88 *E. coli* ST131 strain GUE (pGUE-NDM, Genbank accession: JQ364967) (Bonnin et al. 2012).

89

90 Other *E. coli* MDR clones such as ST131 have been well-characterised genetically (Price et al. 2013;  
91 Petty et al. 2014; Ben Zakour et al. 2016), but very little is known about *E. coli* ST101 at the genomic  
92 level, despite numerous reported cases of carbapenemase-producing *E. coli* ST101 (Mora et al.  
93 2011; Mushtaq et al. 2011; Peirano et al. 2013; Yoo et al. 2013; Poirel et al. 2014; Mantilla-Calderon

94 et al. 2016). Mushtaq *et al*, 2011 showed that ST101 strains have acquired NDM-positive plasmids  
95 of different incompatibility groups and demonstrated diverse PFGE banding patterns for *E. coli*  
96 ST101 strains, with some evidence of clonal expansion due to clustering of pulsotypes (Mushtaq et  
97 al. 2011). Additionally, serotyping of five ST101 isolates indicated that they were O-non-  
98 typeable:H21/42 and contained an array of virulence genes; including *fimH*, *pap*, *sfa/focDE* (fimbrial  
99 genes), *iucD*, *iroN* (siderophore genes), *iss*, *traT* (protection genes), and *tsh* (serine protease gene)  
100 (Mora et al. 2011). Other studies have reported varying levels of virulence potential in ST101  
101 isolates; however in all cases, these strains contained numerous adhesins, autotransporters and  
102 siderophores normally associated with extra-intestinal pathogenic *E. coli* (Mora et al. 2011; Peirano  
103 et al. 2013; Ranjan et al. 2016).

104

105 There are now several *E. coli* ST101 genomes and NDM-positive plasmid sequences available in  
106 public databases, but as yet there are no analyses of any *E. coli* ST101 complete genomes that have  
107 been published. Draft assemblies provide limited information in terms of genomic context of mobile  
108 elements such as insertion sequences (IS), phages, genomic islands and plasmids. The complete  
109 assembly of these mobile elements is crucial for characterising the genomic context of resistance  
110 elements (Conlan et al. 2014; Zowawi et al. 2015). Here we present a comprehensive genomic  
111 analysis of *bla*<sub>NDM-1</sub> carriage in *E. coli* ST101. Using a combination of PacBio SMRT sequencing and  
112 Illumina sequencing, we defined the plasmid context of *bla*<sub>NDM-1</sub> in seven ST101 isolates. We also  
113 report the complete genome of two representative ST101 strains: MS6192 and MS6193, including  
114 manual curation of all MGEs. Using publicly available ST101 draft genomes, we also examined the  
115 phylogeny of ST101 and defined two major clades (1 and 2), with the majority of Clade 1 strains  
116 encoding resistance to carbapenems and extended spectrum cephalosporins (ESCs).

117

## 118 **Results**

119 **NDM-positive *E. coli* ST101 genomes.** During our molecular characterisation of 16 carbapenemase  
120 producing *E. coli* collected from India and the United Kingdom (Kumarasamy et al. 2010; Djoko et  
121 al. 2017) we found seven that were phylogroup B1, sequence type (ST)101 and NDM-positive by  
122 PCR (Supplementary Appendix and Supplementary Dataset, Table S1). To investigate the genomic  
123 context of *bla*<sub>NDM-1</sub> and characterise ST101 at the genomic level we undertook whole genome  
124 sequencing (WGS). The genomes of seven *bla*<sub>NDM-1</sub>-positive ST101 strains were assembled from a  
125 combination of PacBio RSI or RSII long-read data and Illumina HiSeq paired-end data. In all cases we  
126 could assemble a single plasmid encoding *bla*<sub>NDM-1</sub> together with several other antimicrobial  
127 resistance (AMR) genes (see below). There were sufficient long-reads to enable the assembly of  
128 complete, finished quality, genome sequences for two of the strains: MS6192 and MS6193  
129 (Supplementary Dataset, Table S2).

130

131 *E. coli* MS6192 is comprised of a single circular chromosome of 4,879,059 bp (Table 1). Four  
132 circularised contigs of 142,820 bp, 76,661 bp, 86,357 bp and 3,608 bp represent the large *bla*<sub>NDM-1</sub>  
133 encoding MDR plasmid pMS6192A-NDM (4 replicons: FII and FII(pCoo) replicons and an FIA and FIB  
134 replicon, IncF replicon sequence type (IncF RST) F36/F22:A1:B20), pMS6192B (FII, F2:A-:B-),  
135 pMS6192C (Incl1, PMLST ST173) and the small cryptic plasmid pMS6192D (ColRNAI), respectively.

136 *E. coli* MS6193 is comprised of a single circular chromosome of 4,922,872 bp. Additionally, there  
137 were three circularised contigs; 142,890 bp, 76,661 bp and 4,367 bp, which represent the large  
138 *bla*<sub>NDM-1</sub> encoding MDR plasmid pMS6193A-NDM (4 replicons: FII and FII(pCoo), FIA and FIB,  
139 F36/F22:A1:B20), pMS6193B (FII, F2:A-:B-) and pMS6193C (untypeable).

140

141 The chromosomes and large MDR plasmids of MS6192 and MS6193 were almost identical, differing  
 142 by 12 single nucleotide polymorphisms (SNPs) within the substitution-only core-chromosome. The  
 143 genomes could also be distinguished by the presence of an additional prophage (Phi8) and  
 144 Transposon 7 (Tn7)-like transposon in *E. coli* MS6193 (Supplementary Appendix, Fig S1), an  
 145 additional large plasmid in MS6192 (pMS6192C) and the presence of two different cryptic plasmids  
 146 (pMS6192D and pMS6193C).

147

148 **Table 1. Summary of genomic information for *E. coli* ST101 strains MS6192 and MS6193.**

149

|                       | MS6192<br>chr <sup>1</sup>    | MS6193<br>chr <sup>1</sup>    | pMS6192A-<br>NDM/<br>pMS6193A-<br>NDM<br>(FII/FII:F1A:F1B) | pMS6192B/<br>pMS6193B<br>(FII) | pMS6192C <sup>2</sup><br>(Incl1) | pMS6193C <sup>2</sup><br>(colRNAI) | pMS6192D<br>(untypeable) |
|-----------------------|-------------------------------|-------------------------------|------------------------------------------------------------|--------------------------------|----------------------------------|------------------------------------|--------------------------|
| Size<br>(bp)          | 4,879,059                     | 4,922,872                     | 142,820/<br>142,890                                        | 76,661/<br>76,661              | 86,357                           | 4,367                              | 3,608                    |
| No. of<br>genes       | 4,834                         | 4,876                         | 174/173                                                    | 84/84                          | 94                               | 6                                  | 2                        |
| No. of<br>CDS         | 4,570                         | 4,612                         | 169/167                                                    | 82/82                          | 91                               | 5                                  | 1                        |
| No. of<br>tRNAs       | 94                            | 94                            | -                                                          | -                              | -                                | -                                  | -                        |
| No. of<br>rRNAs       | 22 (7:16S,<br>7:23S,<br>8:5S) | 22 (7:16S,<br>7:23S,<br>8:5S) | -                                                          | -                              | -                                | -                                  | -                        |
| No. of<br>IS          | 46                            | 44                            | 21/21                                                      | 5/5                            | 0                                | 0                                  | 0                        |
| G+C<br>content<br>(%) | 50.69                         | 50.69                         | 51.5/51.50                                                 | 51.91/51.91                    | 50.14                            | 54.39                              | 43.15                    |

150 <sup>1</sup>chr = chromosome

151 <sup>2</sup>MS6192 has 4 plasmids (pMS6192A, pMS6192B, pMS6192C and pMS6192D); MS6193 has 3 plasmids (pMS6193A,  
 152 pMS6193B, pMS6193C); There is no genetic relationship between pMS6192C and pMS6193C.

153

154 MS6194, MS6201, MS6203, MS6204 and MS6207 strains were assembled as draft genomes with  
 155 gapped chromosomes and circularised plasmid sequences. The five draft *E. coli* ST101 genomes  
 156 range in size from 5,150,883 to 5,434,929 bp with the number of contigs ranging from 16 to 55

157 (Supplementary Dataset, Table S2). Each draft genome contained a single *bla*<sub>NDM-1</sub> encoding MDR  
 158 plasmid and several plasmid replicons ranging from one (MS6203) to seven (MS6204).

159

160 **Phylogenomic analysis of *E. coli* ST101 reveals a monophyletic lineage within the B1 phylogroup.**

161 To explore the context of ST101 within the *E. coli* phylogeny we carried out a phylogenetic  
 162 reconstruction of 65 representative, publicly available, complete *E. coli* genomes together with 20  
 163 ST101 genomes. These included the seven ST101 genomes sequenced in the present study and 13  
 164 *E. coli* ST101 draft genomes that were previously published and available in Genbank or the  
 165 Sequence Read Archive (SRA) on October 1<sup>st</sup>, 2016 (Supplementary Dataset, Table S3). The  
 166 additional ST101 genomes were obtained from several clinical sources and included isolates from  
 167 urine (n = 5), blood (n = 4), wound (n=1) and intestinal microbiota (n = 2). A single environmental  
 168 isolate from untreated wastewater was also included. All 20 *E. coli* ST101 strains cluster together in  
 169 a single lineage within the B1 phylogroup (Figure 1A). Based on the representative complete  
 170 genomes included in this phylogeny, the *E. coli* ST101 lineage is most closely related to *E. coli* SE11,  
 171 a fecal strain of serotype O152:H28, isolated from a healthy adult (Oshima et al. 2008).

172

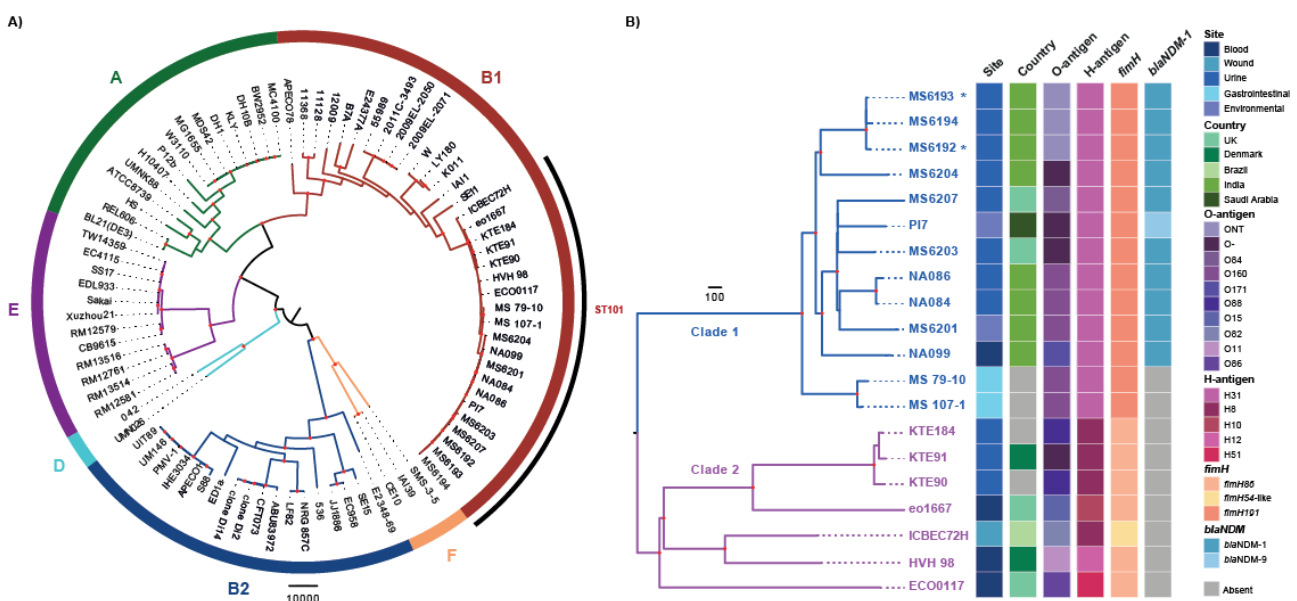

173



174 **Figure 1. Phylogenetic relationship of *E. coli* ST101.** A) The phylogram was built from 182,264 core-genome  
175 SNPs using Maximum Likelihood. The tree was rooted using the out-group species *E. fergusonii* ATCC35469  
176 (not shown). The taxa labels for complete *E. coli* genomes are coloured as follows; phylogroup F: orange,  
177 phylogroup B2: dark blue, phylogroup D: aqua, phylogroup E: purple, phylogroup A: green, phylogroup B1:  
178 red (ST101 labelled). B) The mid-point rooted, recombination-filtered phylogram was built from 2,106 core-  
179 genome SNPs. Two clades can be defined. Clade 1 (blue): MS6193\*, MS6194, MS6192\*, MS6204, MS6207,  
180 PI7, MS6203, NA086, NA084, MS6201, NA099, MS 79-10 and MS 107-1; Clade 2 (pink): KTE184, KTE91, KTE90,  
181 eo1667, ICBE72H, HVH 98 and ECO0117. NT: non-typeable, - indicates absence of locus. Bootstrapping  
182 support indicated by red nodes: 95-100% bootstrap support from 1000 replicates. \*Denotes complete  
183 genomes.  
184

185 The ST101 phylogeny formed two distinct clades, with Clade 1 showing more recent clonal  
186 expansion compared with the deeper branching Clade 2 (Fig 1B). Clade 1 is mostly comprised of  
187 urine isolates and includes all NDM-positive ST101, including the seven ST101 isolates sequenced in  
188 this study. In fact, only the two gut-derived isolates (MS 107-1 and MS 79-10) lack the *bla*<sub>NDM-1</sub> gene  
189 (or its single amino acid variant *bla*<sub>NDM-9</sub> (E152K), present in PI7). The phylogenetic position of  
190 MS 107-1 and MS 79-10, basal to the remaining NDM-positive ST101 strains, suggests that *bla*<sub>NDM-1</sub>  
191 was acquired once in Clade 1 and has been inherited vertically.

192  
193 To further characterise the ST101 lineage we examined key virulence and serotyping gene loci. Clade  
194 1 isolates have the *fimH*191 type 1 fimbrial adhesion allele, whereas Clade 2 isolates possess the  
195 *fimH*86 allele except for ICBE72H, which encodes a novel *fimH*54-like variant. Several serogroups  
196 were predicted across both clades: O160 (MS107-1, MS79-10, MS6201, NA084 and NA086), O171  
197 (NA099), O84 (MS6207) and a novel, non-typeable O antigen region (MS6192, MS6193 and  
198 MS6194), but Clade 1 is distinguished by a *fliC* gene encoding the H31 antigen. Additionally, three  
199 Clade 1 strains lack part of the O antigen gene locus: MS6203, MS6204 and PI7 (*wzx*, *wzy*, *wzm* and  
200 *wzt*).

201  
202 **Mobile genetic elements are variably conserved in *E. coli* ST101.** The major differences between  
203 these ST101 genomes were MGEs, such as those defined in *E. coli* MS6192 and MS6193 (Figure 2

204 and Supplementary dataset, Table S4). MGEs in MS6192 and MS6193 include genomic islands (GI)  
205 within known integration tRNA hotspots (*GI-leuX*, *GI-pheU*, *GI-pheV*, *GI-glyU*), prophage elements  
206 and a Transposon-7 (Tn7)-like transposon (Supplementary Dataset, Table S5). While no MGE that  
207 was defined in MS6192 or MS6193 is completely conserved across the ST101 lineage, *GI-leuX* is  
208 present in most strains from Clades 1 and 2, and Prophage (Phi) 3 is conserved in all Clade 1 strains.  
209 MS6192, MS6193 (and MS6194) differ in only two chromosomal MGEs (Phi8 and Tn7-like GI)  
210 consistent with their near identical core chromosomes. In contrast to the *GI-pheV* islands of  
211 phylogroup B2 ExPEC/UPEC strains, such as the 75,054 bp locus in the *E. coli* ST131 strain EC958  
212 (Totsika et al. 2011; Forde et al. 2014), the GI within the tRNA-*pheV* locus in MS6192 and MS6193 is  
213 relatively small (9,191 bp) and does not contain known virulence modules. Other genomic regions  
214 of difference (RD) that are known to be variable across *E. coli* are present in MS6192 and MS6193  
215 (Supplementary Dataset, Table S6) and are also conserved across the ST101 lineage. These include  
216 a remnant of the Type VI secretion system (T6SS) (Alteri and Mobley 2016), the Flag-2 lateral  
217 flagellar locus (Ren et al. 2005) and a degenerate Type III secretion locus 2 (ETT2), most commonly  
218 found in intestinal pathogenic *E. coli* from the B1 phylogroup and rarely found in ExPEC (Zhou et al.  
219 2014). *E. coli* ST101 strains MS6192 and MS6193 also share 44 chromosomal insertion sequences  
220 (IS) (Supplementary Dataset, Table S7).

221

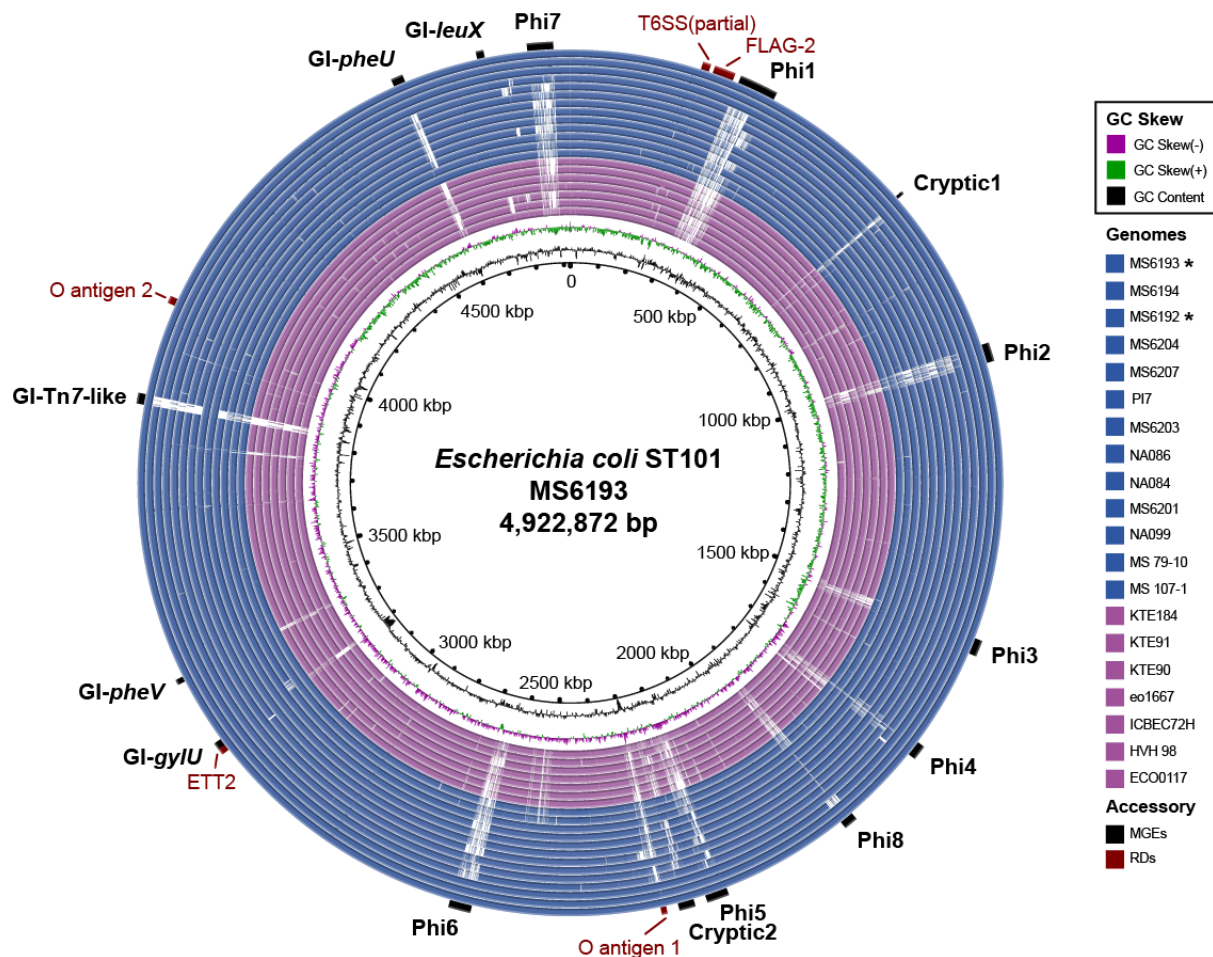

222

223 **Figure 2. Genomic map of ST101 *E. coli* showing mobile genetic elements and other notable genomic**  
 224 **regions.** Visualisation of the *E. coli* MS6193 genome compared to 19 *E. coli* ST101 complete and draft  
 225 genomes. The innermost circles represent GC skew (green/purple) and GC content (black) of *E. coli* MS6193.  
 226 The degree of coloured shading indicates the nucleotide identity between MS6193 and each *E. coli* ST101  
 227 genome. Nucleotide comparisons are coloured based on identity of between 70% and 100% (dark shading =  
 228 high, light shading = low). *E. coli* genomes are arranged according to their previously defined phylogenetic  
 229 relationship as follows from the innermost ring: Clade 2 (pink): ECO0117, HVH 98, ICBEC72H, eo1667, KTE90,  
 230 KTE91, KTE184; Clade 1 (blue): MS 107-1, MS 79-10, NA099, MS6201, NA084, NA086, MS6203, PI7, MS6207,  
 231 MS6204, MS6192\*, MS6194, MS6193\*. \*Denotes complete genomes. Outer ring indicates mobile genetic  
 232 elements (MGEs) and select ST101 regions of difference (RDs) within the *E. coli* MS6193 genome. Image  
 233 prepared using BRIG.  
 234

235 **Most *E. coli* ST101 Clade 1 strains contain multiple antibiotic resistance genes.** ST101 strains from  
 236 Clade 1 possessed a high number of antibiotic resistance genes, including genes that encode  
 237 resistance to beta-lactams (including carbapenems), aminoglycosides, streptomycins, phenicols,  
 238 sulphonamides, macrolides, trimethoprim and tetracyclines (Figure 3). All NDM-positive ST101  
 239 Clade 1 isolates also contain at least one copy of the *bla*<sub>CTX-M-15</sub> gene that confers resistance to  
 240 cephalosporins. In other *E. coli*, *bla*<sub>CTX-M-15</sub> is often found on conjugative F-type plasmids as part of a

241 Tn3-like *ISEcp1-bla*<sub>CTX-M-15-orf477</sub> mobile element (Price et al. 2013). We could determine the  
242 genomic location of *bla*<sub>CTX-M-15</sub> in all seven of the PacBio sequenced ST101 strains, showing that the  
243 *bla*<sub>CTX-M-15</sub> insertion site was chromosomally located in six of the seven strains (Supplementary  
244 Dataset, Table S8). It appears that *bla*<sub>CTX-M-15</sub> has been acquired once and mobilised to several  
245 different genomic locations by an *ISEcp1* in Clade 1 and inherited vertically in some cases  
246 (Supplementary Appendix).

247

248 Fluoroquinolone resistance in *E. coli* is frequently associated with chromosomal point mutations in  
249 the quinolone resistance-determining region (QRDR) of *gyrA* (codons 67-106) and *parC* (codons 56-  
250 108) (Hopkins et al. 2005). All Clade 1 strains had a non-synonymous mutation in the QRDR of *parC*  
251 (S80I) (Figure 3). Additionally, two non-synonymous mutations in the QRDR of *gyrA* were detected  
252 in all NDM-positive Clade 1 isolates, characterised by the amino acid substitutions S83L and D87N.  
253 The two Clade 1 intestinal isolates MS107-1 and MS79-10 have a different single amino acid  
254 substitution in *gyrA* (D87Y) but lack both *bla*<sub>NDM-1</sub> and *bla*<sub>CTX-M-15</sub>. These results suggest recent  
255 development of extensive MDR in a sub-lineage of Clade 1 (hereafter referred to as Clade 1A),  
256 similar to the emergence of other fluoroquinolone MDR resistant *E. coli* clonal lineages such as  
257 ST131 and ST1193 (Petty et al. 2014; Johnson et al. 2019). Phenotypic antimicrobial resistance  
258 testing of the seven PacBio sequenced ST101 strains in this study confirmed that phenotype could  
259 be predicted from genotype in most cases (Supplementary Appendix and Supplementary Dataset,  
260 Table S9). Notably Clade 2 strains did not encode QRDR mutations, with only HVH 98, ICBE72H and  
261 eo1667 possessing any acquired resistance genes.

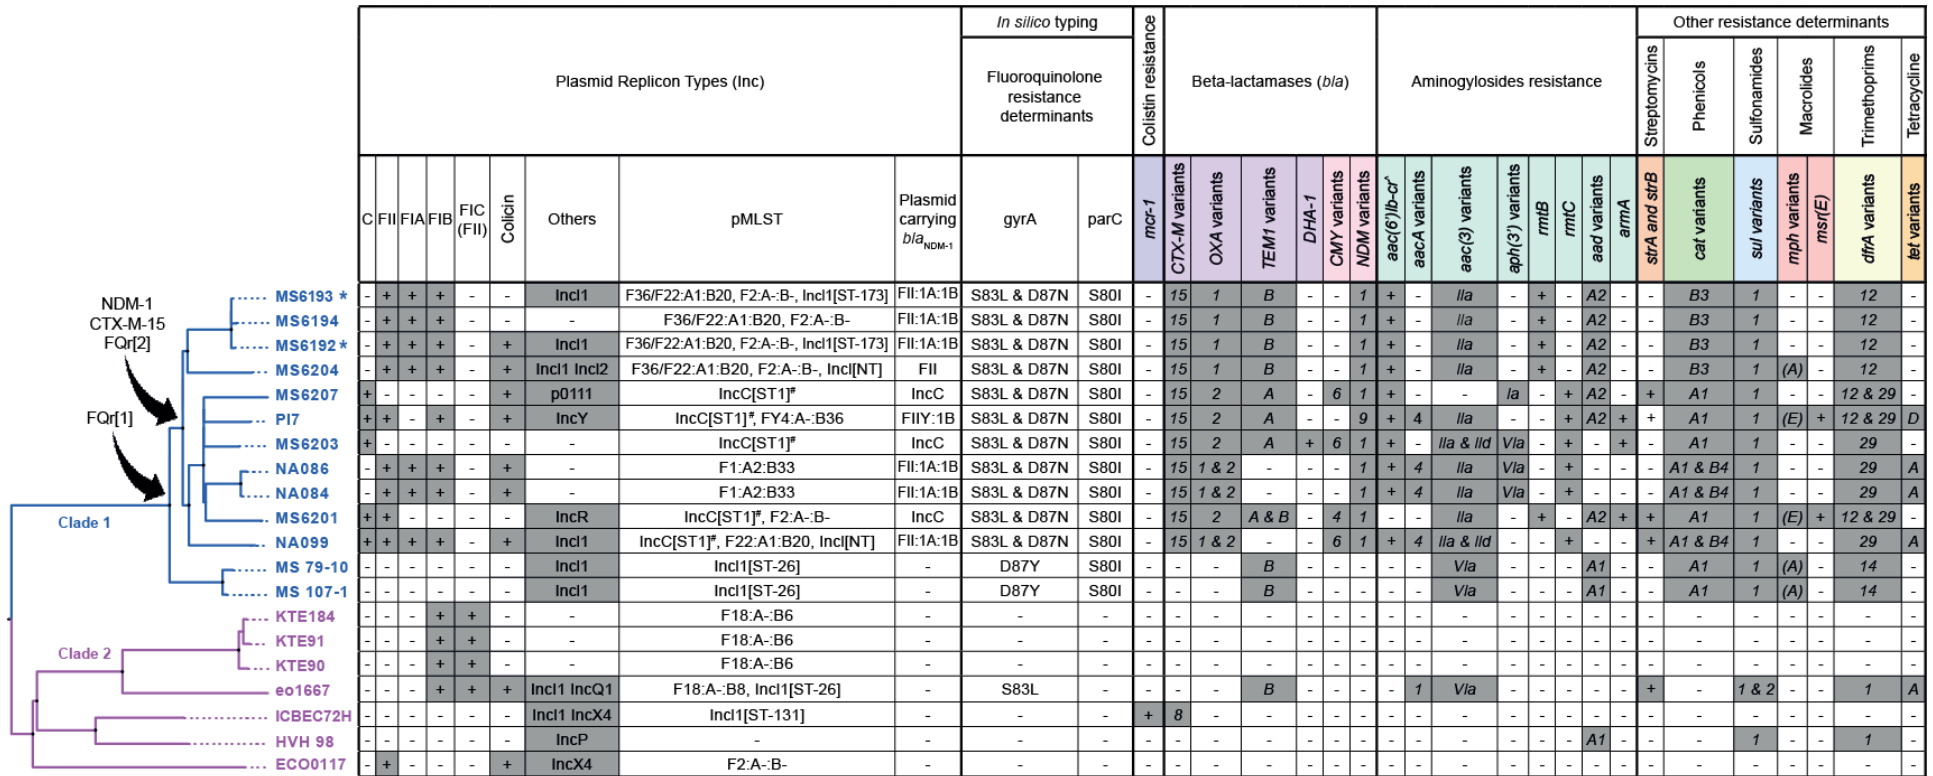

\*Complete genomes. \*Based on IncA/C plasmid typing scheme. NT: Non-typeable Incl sequence type. \*Responsible for both fluoroquinolone and aminoglycoside resistance

262

263 **Figure 3. Plasmid and antimicrobial resistance typing in *E. coli* ST101.** Plasmid replicon types, *in silico* typing and antimicrobial resistance determinants indicate  
 264 similar patterns to the core-genome phylogeny (left) of the 20 *E. coli* ST101 strains. Black arrows indicate acquisition of fluoroquinolone resistance ([1] indicates  
 265 single mutation in *gyrA*, [2] indicates double mutation), *bla*<sub>NDM-1</sub> and *bla*<sub>CTX-M-15</sub> genes. Types of resistance genes are colour coded: colistin resistance (blue-purple)  
 266 beta-lactamases (pink-purple), carbapenemases (pink), aminoglycosides (aqua), streptomycins (orange), phenicolis (green), sulphonamides (blue), macrolides (red),  
 267 trimethoprimis (yellow) and tetracyclins (gold). Grey shading indicates gene presence, white shading indicates absence, allele variants are indicated in each cell.  
 268

269

270 **The *bla*<sub>NDM-1</sub> genetic environment is highly conserved in *E. coli* ST101.** All seven PacBio sequenced  
271 strains contained a plasmid-encoded *bla*<sub>NDM-1</sub> gene (Figure 4). In almost all cases the genetic  
272 structure of the *bla*<sub>NDM-1</sub> module was identical and matched other previously described *bla*<sub>NDM-1</sub>  
273 modules, consisting of a 258-287 bp fragment of *ISAb<sub>a</sub>125* containing the -35 promoter region, the  
274 *bla*<sub>NDM-1</sub> gene, the bleomycin resistance gene (*ble*<sub>MBL</sub>) and a truncated phosphoribosylanthranilate  
275 isomerase (*iso/trpC*) (Dortet et al. 2012). The surrounding plasmid context differed between the  
276 seven strains, but like *bla*<sub>CTX-M-15</sub>, the structural variations (inversions, transpositions and  
277 insertions/deletions) are congruent with a single *bla*<sub>NDM-1</sub> acquisition prior to divergence of Clade  
278 1A. For example, only pMS6203A-NDM has retained a complete *ISAb<sub>a</sub>125* element upstream of  
279 *bla*<sub>NDM-1</sub> suggestive of horizontal transfer. Additionally, downstream of the *bla*<sub>NDM-1</sub> module, *iso/tat*  
280 has been truncated by the insertion of the *bla*<sub>DHA-1</sub> gene. In pMS6201A-NDM, truncation of *ISAb<sub>a</sub>125*  
281 was mediated by the insertion of an *IS3000*. The two *IS3000* flanking the *bla*<sub>NDM-1</sub>/*ble*<sub>MBL</sub> region form  
282 the composite transposon *Tn3000* (Campos et al. 2015). Truncation of *ISAb<sub>a</sub>125* in pMS6192A-  
283 NDM, pMS6193A-NDM, pMS6194A-NDM, pMS6204A-NDM and pMS6207A-NDM appears to have  
284 resulted from the insertion of an *ISEcp1* module, which was subsequently deleted by an *IS26*  
285 composite transposon leaving only a 103 bp fragment of *ISEcp1*. However, pMS6207A differs from  
286 the other four strains with carriage of *aphA6* (amikacin resistance) instead of *aac(3')-IIa* and *tmrB*  
287 (aminoglycoside and tunicamycin resistance) on the *IS26* composite transposon.  
288

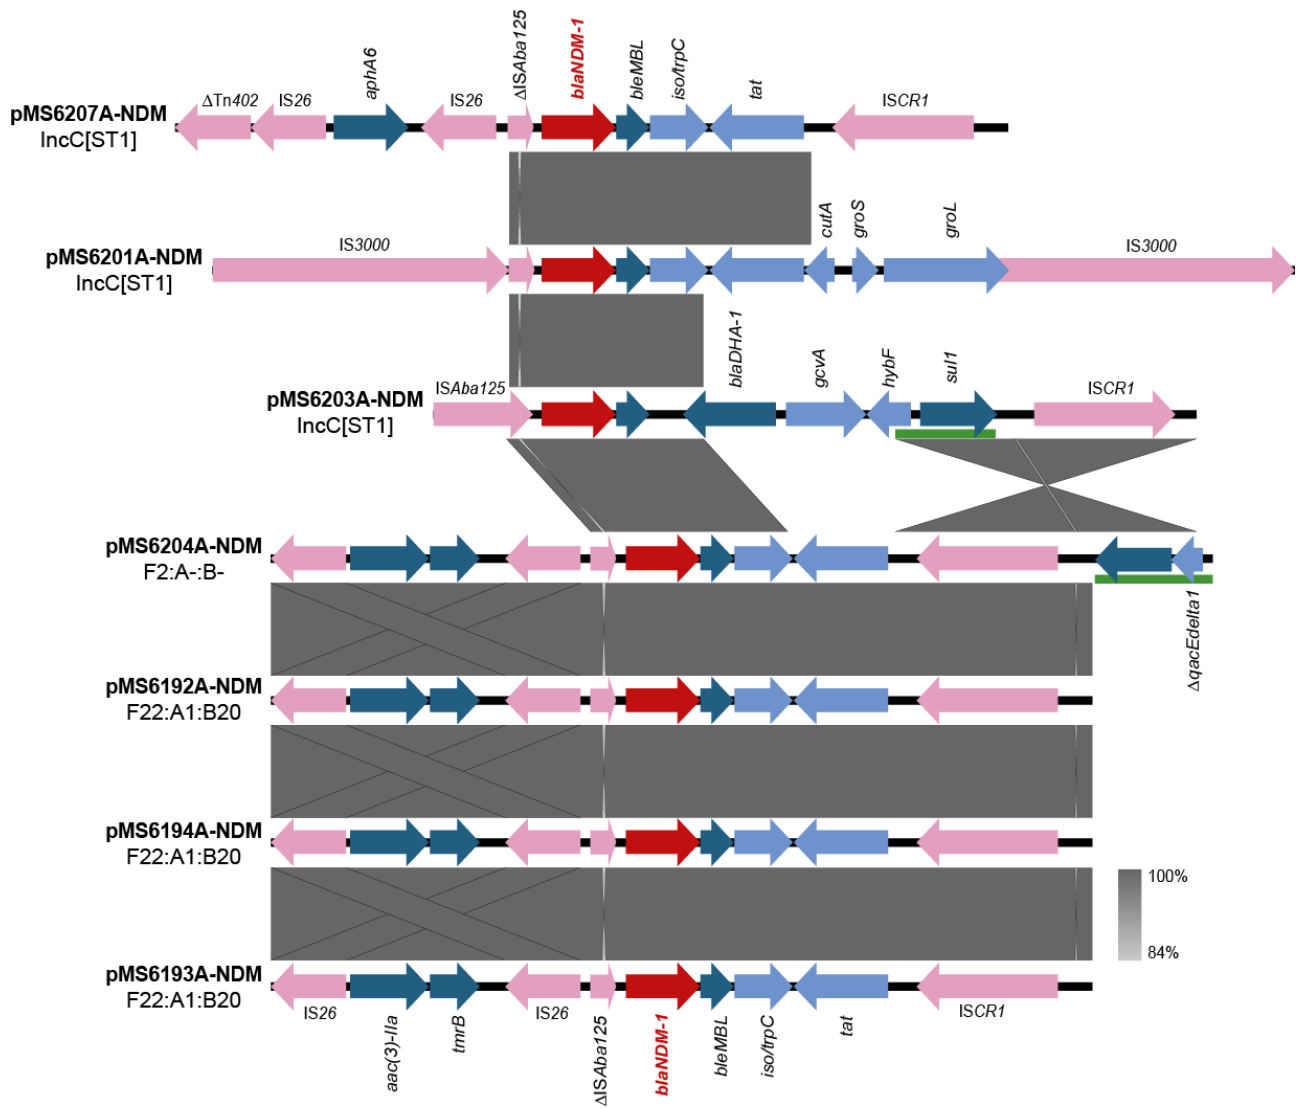

289

290 **Figure 4. Comparison of the *bla*<sub>NDM-1</sub> genetic environment of PacBio sequenced Clade 1 ST101 isolates.** Grey  
 291 shading indicates nucleotide identity between sequences according to BLASTn (84-100%). pMS6204A has  
 292 been reverse complemented for easier visualisation. Δ, truncated gene. IS/Tns: light pink, AMR genes: teal,  
 293 CDSs: light blue. Green rectangles represent 3' conserved sequences of class 1 integrons. The *bla*<sub>NDM-1</sub> gene  
 294 is labelled in red. Image created using EasyFig.  
 295

296 **IncC plasmids are a vehicle for *bla*<sub>NDM-1</sub> carriage in *E. coli* ST101.** IncC plasmids are commonly  
 297 reported carriers of the *bla*<sub>NDM-1</sub> gene in *Enterobacteriaceae* (Hancock et al. 2016; Marquez-Ortiz et  
 298 al. 2017; Sugawara et al. 2017). Three PacBio sequenced ST101 strains from this study contained  
 299 IncC replicons (pMS6201A-NDM, pMS6203A-NDM and pMS6207A-NDM) and possess a similar  
 300 backbone compared to other IncC plasmids such as pNDM-US-2 (Supplementary Appendix, Fig S2).  
 301 However, deletions in the IncC plasmid backbone alter the conjugation efficiency of these plasmids  
 302 such that only pMS6203A is conjugative (Supplementary Appendix). *In silico* plasmid multi-locus

303 sequence typing (pMLST) determined that the IncC plasmids reported here belong to the NDM-  
 304 associated ST1 group (Hancock et al. 2016), with pMS6203A and pMS6207A belonging to the cgST  
 305 1.5. Plasmid pMS6201A is missing several genes, however, is most like cgST 1.1 (Supplementary  
 306 Appendix). These IncC plasmids differ greatly in their structure of the antibiotic resistance island  
 307 (ARI-A) (Supplementary Appendix and Figure 5). Therefore, despite high conservation in the  
 308 immediate genetic context of *bla*<sub>NDM-1</sub> and the IncC plasmid backbone in these ST101 strains, the  
 309 complete plasmid sequences reveal substantial diversity within the ARI-A, consistent with  
 310 mobilisation of AMR genes, including *bla*<sub>NDM-1</sub>.

311

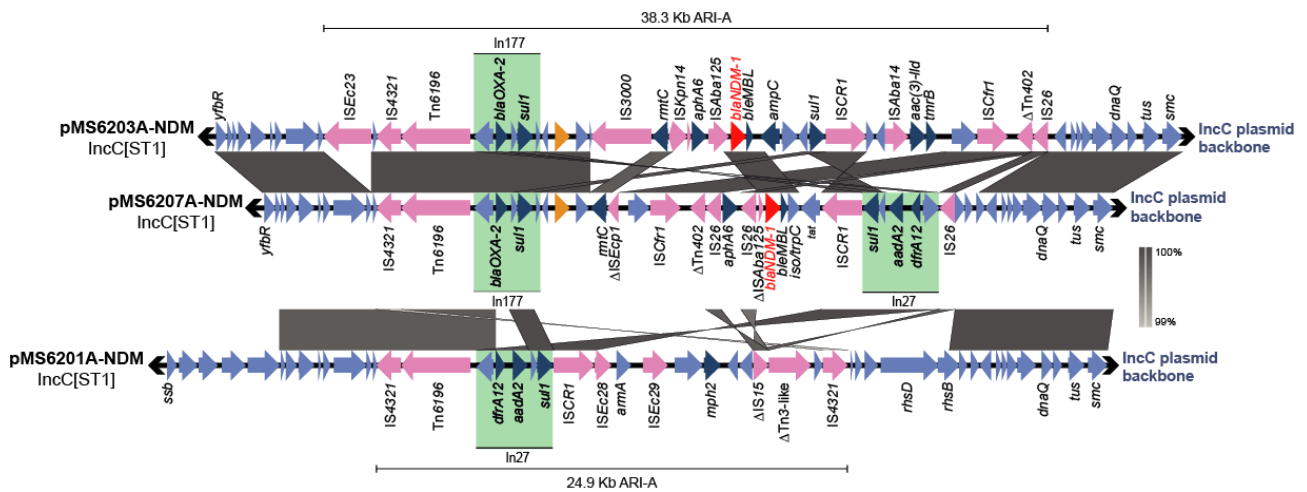

312

313 **Figure 5. Major structural features of the Antibiotic Resistance Island on IncC plasmids in the PacBio**  
 314 **sequenced Clade 1 ST101 strains.** Nucleotide comparisons between the reference plasmid pGUE-NDM  
 315 (Genbank accession: JQ364967), pMS6192A-NDM, pMS6194A-NDM and pMS6193A-NDM highlighting the  
 316 shared resistance island and differing plasmid backbones. pGUE-NDM has been reverse complemented for  
 317 easier visualisation. Grey shading indicates nucleotide identity between sequences according to BLASTn (80-  
 318 100%). Key genomic regions are indicated: IS elements/transposons: light pink, replication genes: dark pink,  
 319 maintenance genes: purple, *pemIK* operon: aqua, MTases: orange, AMR genes: teal, other CDSs: blue,  
 320 Integrons: green rectangles. The *bla*<sub>NDM-1</sub> gene is labelled in red. Image created using EasyFig.

321

322 ***E. coli* ST101 strains possess distinct types of *bla*<sub>NDM-1</sub> containing F-type plasmids.** F-type plasmids  
 323 have previously been associated with the carriage of *bla*<sub>NDM-1</sub> in *E. coli* (Bonnin et al. 2012; Fiett et  
 324 al. 2014; Toleman et al. 2015; Wailan et al. 2015). The four *bla*<sub>NDM-1</sub> encoding F-type plasmids  
 325 sequenced in this study share a near identical 21.6 kb MDR region that includes the *bla*<sub>NDM-1</sub> gene.  
 326 However, two different plasmid backbones were identified; plasmids pMS6192A-NDM, pMS6193A-



327 NDM, pMS6194A-NDM were almost identical, whereas the backbone of pMS6204A-NDM differed  
328 substantially (Supplementary Appendix, Fig S3). BLAST comparisons of the *bla*<sub>NDM-1</sub> containing  
329 plasmids pMS6192A-NDM, pMS6193A-NDM and pMS6194A-NDM (all F36/F22:A1:B20), indicate  
330 that they are most similar to the F-type plasmid pIP1206 (>99% nucleotide identity, 83% query  
331 coverage). Major differences include deletions in the plasmid backbone, where pMS6192A-NDM,  
332 pMS6193A-NDM and pMS6194A-NDM contain an incomplete conjugation region, missing *traK* and  
333 *traB*, as well as an 18,516 bp section between *traU* and *traI* present in pIP1206. Resistance genes in  
334 pMS6192A-NDM, pMS6193A-NDM and pMS6194A-NDM are clustered in a 21.6 Kb resistance-  
335 island, which is different to the resistance island of pIP1206 and is highly similar (99.99% nucleotide  
336 identity, 91% query coverage) to the resistance island in the FII plasmid pGUE-NDM (Supplementary  
337 Appendix, Fig S4).

338  
339 The *bla*<sub>NDM-1</sub> resistance island has inserted between the *pemIK* toxin/antitoxin operon and the *scsCD*  
340 operon (copper-sensitivity suppressor). It is composed of a Tn5403 transposon (containing an intact  
341 transposase and the inverted left repeat (ILR) (Siguier et al. 2006)) truncated by an IS26 (Figure 6).  
342 This is followed by 3 resistance genes; *aac(6')Ib-cr* (fluoroquinolone and aminoglycoside resistance),  
343 *bla*<sub>OXA-1</sub> (beta-lactam resistance) and a truncated *catB3* (chloramphenicol resistance). Two  
344 additional resistance genes *aac(3)-IIa* (aminoglycoside resistance) and *tmrB* (tunicamycin  
345 resistance) are downstream and flanked on either side by IS26 elements. The *bla*<sub>NDM-1</sub> module  
346 consists of an IS*Aba125* fragment containing the *bla*<sub>NDM-1</sub> -35 promoter region, *bla*<sub>NDM-1</sub>  
347 (carbapenem resistance), *ble*<sub>MBL</sub> (bleomycin resistance), *iso/trpC* (phosphoribosylanthranilate  
348 isomerase), *tat* (twin-arginine translocation pathway signal protein) and an IS*CR1* element.  
349 Downstream of the *bla*<sub>NDM-1</sub> module is the Class I integron In27. This contains *sul1* (sulphonamide  
350 resistance) and a truncated *qacEdelta1*, followed by *aadA2* (aminoglycoside resistance) and *dfrA12*  
351 (trimethoprim resistance). This MDR region ends with a truncated TnAs3 transposon (containing

352 intact transposase and recombinase genes and the inverted right repeat (IRR) (Siguier et al. 2006;  
 353 He et al. 2016)).  
 354

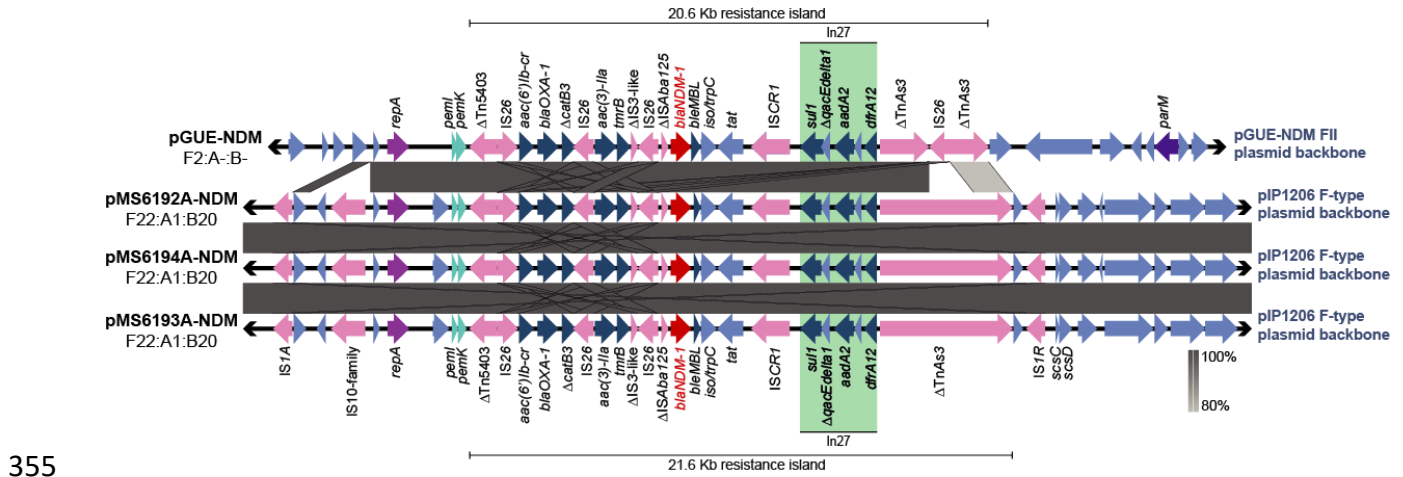

355  
 356 **Figure 6. Major structural features of the conserved MDR island on F-type plasmids in the PacBio**  
 357 **sequenced Clade 1 ST101 strains.** Nucleotide comparisons between the variable resistance regions of the  
 358 IncC plasmid pMS6203A-NDM, pMS6207A-NDM and pMS6201A-NDM. Grey shading indicates nucleotide  
 359 identity between sequences according to BLASTn (98-100%). Key genomic regions are indicated: IS  
 360 elements/transposons: light pink, replication genes: dark pink, maintenance genes: purple, *pemIK* operon:  
 361 aqua, MTases: orange, AMR genes: teal, other CDSs: blue, Integrons: green rectangles. The *bla*<sub>NDM-1</sub> gene is  
 362 labelled in red. Image created using EasyFig.  
 363

364 ***bla*<sub>NDM-1</sub> is encoded on an FII, pGUE-NDM-like plasmid in one ST101 strain.** MS6204 also contains  
 365 an F-type pIP1206-like plasmid (pMS6204B; F36/F22:A1:B20). However, the resistance island in  
 366 pMS6204B is different to that of the pIP1206 reference plasmid and to that of the other *bla*<sub>NDM-1</sub>  
 367 containing plasmids described above. This resistance island does not carry the *bla*<sub>NDM-1</sub> gene,  
 368 however does encode *bla*<sub>CTX-M-15</sub> and additional copies of the *aac(6')-Ib-cr*, *bla*<sub>OXA-1</sub> and *tmrB*  
 369 resistance genes. In fact, for MS6204, the MDR region encoding *bla*<sub>NDM-1</sub> is harboured by pMS6204A-  
 370 NDM (F2:A-B-), an FII plasmid that is most similar to *E. coli* FII plasmid pGUE-NDM (>99% nucleotide  
 371 identity, 95% query coverage). Additionally, present within the MDR region of the pMS6204A-NDM  
 372 plasmid is a 5,095 bp resistance region, which is not present in pGUE-NDM. This region is flanked  
 373 on either side by IS26 and encompasses a Tn3 transposon encoding *bla*<sub>TEM-1B</sub> (beta-lactam  
 374 resistance) followed by *rmtB* (rifampicin resistance). This association between Tn3, *bla*<sub>TEM-1</sub> and

375 *rmtB* flanked by IS26 has been observed in several other *E. coli* and *K. pneumoniae* plasmids  
376 (Supplementary Dataset, Table S10), suggesting widespread distribution of this resistance module.

377

378 **Complete plasmid sequences from closely related ST101 strains show carriage of *bla*<sub>NDM-1</sub> on**  
379 **different F-type plasmids.** Intriguingly MS6192, MS6193 and MS6194 also contain a pGUE-NDM-  
380 like plasmid, almost identical to pMS6204A-NDM (F2:A-:B-; named pMS6192B and pMS6193B in our  
381 complete genomes), however, these plasmids lack the *bla*<sub>NDM-1</sub> encoding MDR island  
382 (Supplementary Appendix, Fig S4). We therefore hypothesise that the entire island encoding  
383 *bla*<sub>NDM-1</sub> was transferred from an FII pGUE-NDM-like plasmid (F2:A-:B-) to an F-type pIP1206-like  
384 plasmid (F36/F22:A1:B20) prior to the divergence of MS6192, MS6193 and MS6194 from MS6204  
385 (Figure 7). The transposition-like rearrangements that led to this new plasmid are likely complex.  
386 According to our model, the most recent common ancestor (MRCA) of MS6204, MS6192, MS6193  
387 and MS6194 contained both an FII pGUE-NDM-like plasmid carrying the *bla*<sub>NDM-1</sub> resistance island  
388 and an F-type pIP1206-like plasmid carrying a different resistance island. In the MRCA of MS6192,  
389 MS6193 and MS6194, the *bla*<sub>NDM-1</sub> resistance island was transferred from the pGUE-NDM-like FII  
390 plasmid to the pIP1206-like F-type plasmid via a transposition-like event. Although we compared  
391 the sequences of plasmids pMS6192B and pMS6193B with pMS6204B at the site of the possible  
392 transposition-like event, no duplications consistent with transposition were identified, as this region  
393 has been replaced with a truncated Tn3. Nonetheless, while the ILR of Tn5403 and IRR of TnAs3 are  
394 present, along with intact transposase and recombinase genes, it remains unknown whether the  
395 MDR island in its current form is capable of active transposition.

396

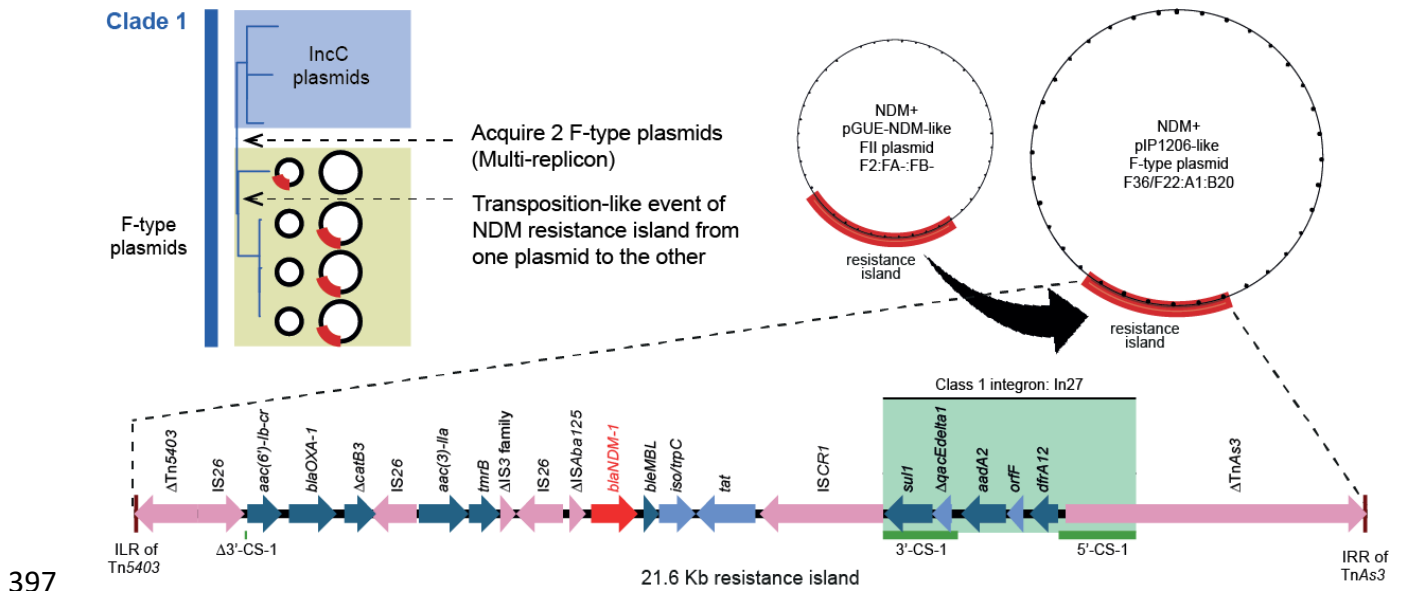

397

398 **Figure 7. Proposed model of transfer of NDM+ resistance island between F-type plasmids.** The acquisition  
 399 of a pGUE-NDM-like plasmid and a pIP1206-like plasmid (Steps 1 & 2) occurred in the MRCA of MS6204,  
 400 MS6192, MS6194 and MS6193. A transposition-like event of the entire resistance island between both FII  
 401 plasmids resulted in the transfer of *bla*<sub>NDM-1</sub> and surrounding resistance genes. Key regions of the resistance  
 402 island are indicated:  $\Delta$ : truncated gene, CDS: light blue, IS/Tns: light pink, AMR genes: teal, Integron: green  
 403 rectangle. 5' and 3- conserved sequences of class 1 integrons: dark green. The *bla*<sub>NDM-1</sub> gene is labelled in red.  
 404 The ILR of Tn5403 and IRR of TnAs3 are indicated at the edges of the island.  
 405

406

## 406 Discussion

407 Here we used PacBio SMRT sequencing to provide the most comprehensive genomic snapshot of  
 408 *bla*<sub>NDM-1</sub> carriage in the *E. coli* ST101 lineage to date. We show that this lineage is monophyletic  
 409 within the B1 phylogroup with at least two distinct clades that we have labelled Clade 1 and Clade  
 410 2. We show that *bla*<sub>NDM-1</sub> carriage is confined to Clade 1 and associated with fluoroquinolone  
 411 resistance mutations and other resistance genes such as *bla*<sub>CTX-M-15</sub>. By determining the complete  
 412 sequence of two closely related ST101 strains and the complete plasmid sequences for five other  
 413 ST101 strains, we have characterised the genomic context of *bla*<sub>NDM-1</sub> and other resistance genes.  
 414 Notably, we revealed a mosaic region of AMR genes including *bla*<sub>NDM-1</sub> within the ARI-A region of  
 415 IncC plasmids and transfer of a large MDR resistance region encoding *bla*<sub>NDM-1</sub> between two  
 416 different F-type plasmids. These results highlight the power of long-read sequencing in revealing  
 417 the full complexities of mobile genetic elements.  
 418

418

419 Identifying the genomic characteristics of *E. coli* lineages is crucial to explaining the evolution and  
420 global dissemination of successful clones. Carbapenem resistance resulting from the acquisition of  
421 plasmids carrying *bla*<sub>NDM-1</sub> has been characterised in several *E. coli* clonal lineages, such as ST405,  
422 ST131 and ST101 (Mushtaq et al. 2011). However, despite numerous reports of *bla*<sub>NDM-1</sub> or variants  
423 within the *E. coli* ST101 lineage (Mushtaq et al. 2011; Peirano et al. 2013; Yoo et al. 2013; Poirel et  
424 al. 2014; Toleman et al. 2015; Ranjan et al. 2016), there remains a paucity of whole genome studies.  
425 The use of PacBio SMRT sequencing long-read technology in this study enabled the *de novo*  
426 assembly of two complete ST101 genomes (MS6192 and MS6193) and five high-quality draft  
427 genomes (MS6194, MS6201, MS6203, MS6204 and MS6207). The inability to completely resolve  
428 the genomes of the other five isolates was due to low data output achieved using a single SMRT cell  
429 on the PacBio RSI platform. Despite this impediment we could completely resolve all plasmid  
430 sequences carrying *bla*<sub>NDM-1</sub> and define the context of AMR elements within these seven isolates.  
431  
432 Our comparisons of the very closely related ST101 strains MS6192, MS6193 and MS6194 revealed  
433 a pattern of genome conservation consistent with a close evolutionary relationship. For example, a  
434 conserved core and accessory genome with only 12 core SNP differences between the  
435 chromosomes of MS6192 and MS6193, the conservation of both FII plasmid backbones (pGUE-  
436 NDM-like and pIP1206-like), as well as the stepwise acquisition of Phi 8 (present in MS6194 and  
437 MS6193, but not MS6192) and the Tn7-like transposon (present only in MS6193) are consistent with  
438 epidemiologically-linked strains. This level of chromosomal similarity is consistent with long-term  
439 gut colonisation by a clonal population of Enterobacteriaceae (Conlan et al. 2016). In fact, we also  
440 recently reported the existence of an indigenous clonal lineage (with significant plasmid diversity)  
441 amongst *E. coli* ST131 isolates collected from urine and fecal samples over a five-year period from a  
442 patient with recurrent urinary tract infection (Forde et al. 2019). Analysis of the core genome of the  
443 20 ST101 isolates also indicates a close relationship, however considerable diversity is observed in

444 their MGE complement. These differences are particularly evident between clades, where MGEs  
445 such as prophages and genomic islands defined in our reference ST101 genomes MS6192 and  
446 MS6193, in general, are not conserved. Exceptions include the *GI-leuX* locus, which is intact in most  
447 Clade 1 and 2 strains.

448

449 Nonetheless, our study is limited by the availability of temporal and geographic metadata for all  
450 sequenced strains, which restricts our ability to interpret the ST101 phylogeny. We also note that  
451 the relatively small number of ST101 complete and draft genomes that were both publicly available  
452 and published, constrained our ability to fully characterise the clade structure of this lineage.  
453 However, both clades were supported in a larger analysis of 263 available ST101 draft genomes  
454 obtained from EnteroBase (30/07/18) (Alikhan et al. 2018) that were of suitable quality for  
455 phylogenetic analysis (Supplementary Appendix, Fig S5). Perhaps more importantly, our finding that  
456 *bla<sub>NDM-1</sub>* (or its variants) was confined to a single sub-lineage within Clade 1 (Clade 1A) remains  
457 intact.

458

459 MDR is primarily disseminated within ST101 Clade 1A by plasmids of the groups Inc11, IncC and F-  
460 type. The genetic elements harbouring *bla<sub>NDM-1</sub>* can spread among Gram-negative bacteria such as  
461 *Acinetobacter*, *Pseudomonas* and *Enterobacteriaceae* including *K. pneumoniae* and *E. coli* (Diene  
462 and Rolain 2014), where IncC and FII plasmids have previously been reported as carriers of *bla<sub>NDM-1</sub>*  
463 (Bonnin et al. 2012; Hudson et al. 2014). Antimicrobial susceptibility testing showed that the AMR  
464 phenotype closely matched the AMR genotype for the seven PacBio sequenced ST101 genomes in  
465 this study. However, MS6207 had an intermediate resistance phenotype to Meropenem and  
466 Imipenem (Supplementary Dataset 1, Table S9), despite the presence of the *bla<sub>NDM-1</sub>* gene, reflecting  
467 the fact that AMR prediction from WGS data in *Enterobacteriaceae* is difficult (Ingle et al. 2018; Su  
468 et al. 2019).

469

470 In this study, we characterised two pathways for *bla*<sub>NDM-1</sub> persistence in ST101 Clade 1A. For strains  
471 with IncC plasmids, carriage of *bla*<sub>NDM-1</sub> was associated with recombination of class 1 integrons and  
472 transposition of composite transposons and IS elements, resulting in differences in AMR gene  
473 repertoire. For the F-type plasmids however, we show carriage of the *bla*<sub>NDM-1</sub> resistance island in  
474 one F-type plasmid, with possible transfer to the other. Transposition events mediated by both IS  
475 and transposons enable the mobility of entire resistance islands, particularly in the  
476 *Enterobacteriaceae* (Toleman and Walsh 2011). For example, a recent study showed that  
477 transposition mediated by IS26, Tn5403 and Tn3-family transposons such as those found flanking  
478 this *bla*<sub>NDM-1</sub> resistance island facilitated plasmid rearrangements in carbapenem resistant  
479 *K. pneumoniae* (He et al. 2016).

480

481 Fluoroquinolone resistance in Clade 1 strains is attributed to vertically transmitted point mutations  
482 within the QRDR of *gyrA* (S83L, D87N and D87Y alleles) and *parC* (S80I allele). This is similar to the  
483 ST131 lineage where acquisition of QRDR alleles imparting fluoroquinolone resistance occurred in  
484 the MRCA prior to the divergence of Clade C (Ben Zakour et al. 2016). With the presence of  
485 chromosomally acquired fluoroquinolone resistance and the acquisition of plasmid encoded  
486 resistance genes to more than nine different antimicrobial classes, these extensively MDR Clade 1  
487 strains leave few choices for treatment. Older drugs such as colistin are now being used as last-  
488 resort treatments for carbapenem-resistant infections (Yamamoto and Pop-Vicas 2014). In 2016,  
489 however an ST101 strain (ICBEC72H, included in this study) containing the *mcr-1* colistin resistance  
490 gene on an IncX plasmid backbone was identified (Fernandes et al. 2016). With recent reports of  
491 both carbapenem and colistin resistant *E. coli* strains appearing (Zheng et al. 2016; Zhong et al.  
492 2017), we face the very real possibility of pan-drug resistant *E. coli*. Overall, these high-quality *E. coli*

493 ST101 genomes will provide an important reference for further analysis of how mobile genetic  
494 elements and antimicrobial resistance influence the evolution of this emerging, MDR *E. coli* lineage.

495

## 496 **Methods**

497 **Bacterial genome sequencing and assembly of our seven PacBio sequenced strains.** The *bla*<sub>NDM-1</sub>-  
498 positive *E. coli* strains used in this study have been described previously and were screened for the  
499 presence of *bla*<sub>NDM-1</sub> by PCR (Kumarasamy et al. 2010; Djoko et al. 2017). Additional details regarding  
500 strain selection and DNA isolation methods can be found in the Supplementary Appendix. Six of  
501 seven strains were sequenced on the PacBio RSI instrument, as previously described (Forde et al.  
502 2014), using a 10 Kb insert library. *E. coli* ST101 strain MS6192 used six SMRT cells, with MS6194,  
503 MS6201, MS6203, MS6204, MS6207 using two SMRT cells each. *E. coli* ST101 strain MS6193 was  
504 sequenced on the PacBio RSII instrument using three SMRT cells with P4-C2 chemistry. Raw  
505 sequencing reads were *de novo* assembled using the Hierarchical Genome Assembly Process (HGAP)  
506 (Chin et al. 2013) as implemented in the PacBio SMRT Analysis software suite v2.3.0, with a seed  
507 read cut-off length of 6,000 bp and default parameters. For *E. coli* MS6192 and MS6193, contig  
508 order and orientation was determined using Contiguity and nucleotide blast of the overlapping  
509 sequences at each contig end. The merged assemblies were then checked against the closely related  
510 commensal strain *E. coli* SE11 using Mauve v2.3.1 (Darling et al. 2010). Additionally, two small,  
511 spurious contigs were generated during the *de novo* assembly of MS6192, consisting of rRNA and  
512 tRNA genes that mapped to multiple locations with 100% nucleotide identity to the MS6192  
513 chromosome. These were deemed chimeric contigs and were not included in the final assembly.  
514 Contiguity (Sullivan et al. 2015) was used to visualise the assembly, with overlapping contigs  
515 manually trimmed and circularised. Misassemblies were corrected by aligning the reads using BLASR  
516 (Chaisson and Tesler 2012), prior to sequence polishing. Raw sequence reads were then mapped to  
517 these consensus contigs using Quiver, implemented in the SMRT Analysis software suite, filtering



518 errors from the assembly. Furthermore, read pileups across all repetitive (rRNA) regions were  
519 manually inspected to ensure that their position was supported by spanning reads.

520

521 Draft PacBio sequenced ST101 assemblies were screened for plasmid sequences using all-versus-all  
522 nucleotide comparisons to generate inter and intra-contig pairwise alignments. All contigs were  
523 then screened for overlapping sequences at the 5' and 3' ends as this is an artefact of the HGAP  
524 assembly process (Chin et al. 2013) and contigs with self-similar ends likely represent fully complete,  
525 circular plasmids. One end of the contig was trimmed to produce a circular sequence. Additional,  
526 putative plasmid contigs were screened by nucleotide BLAST comparison against the NCBI non-  
527 redundant database. As an additional quality control step, Illumina HiSeq paired-end reads were  
528 mapped against each respective genome using bwa 0.7.17-r1188 (Li and Durbin 2009), with Pilon  
529 v1.22 (Walker et al. 2014) used to correct for small indels. Plasmid misassemblies in MS6192 were  
530 corrected using alternative assembly methods (Supplementary Appendix).

531

532 **Genome annotation.** The automated annotation of all PacBio sequenced ST101 strains (2 complete,  
533 5 draft assemblies) was done using Prokka v1.11 (Seemann 2014) using a custom *Escherichia*  
534 database consisting of protein sequences from the EcoCyc website (<http://ecocyc.org/>) and  
535 annotated NDM+ reference plasmids (Supplementary Dataset, Table S11). For the complete  
536 genomes: *E. coli* MS6192 and MS6193, prophages, genomic islands and insertion sequences (IS)  
537 were identified using PHAST (Zhou et al. 2011), IslandViewer 3 (Dhillon et al. 2015) and ISSaga  
538 (Varani et al. 2011) respectively. Draft annotations for MS6192 and MS6193 were then visualised  
539 using Artemis and subjected to manual improvement. Insertion sequence, integrons and  
540 antimicrobial resistance cassettes within the complete plasmid sequences were manually curated  
541 by nucleotide comparisons against ISSaga, Integrall and the Repository of Antibiotic Resistance  
542 Cassettes (Moura et al. 2009; Tsafnat et al. 2011; Varani et al. 2011) databases, respectively.

543

544 **Additional *E. coli* ST101 genomes included in this study.** To further characterise the ST101 lineage,  
545 13 additional ST101 draft genomes were downloaded from Genbank or the SRA. Three genomes  
546 (ECO0117, eo1667 and PI7) were only available as Illumina paired-end short reads and were  
547 assembled *de-novo* using Spades v3.10.1 with default parameters. Strain names, accessions,  
548 sources, sequencing method and available metadata are summarised in Supplementary Dataset,  
549 Table S3.

550

551 **Phylogenetic analysis and recombination filtering.** To determine the phylogenetic relationship of  
552 ST101 and other *E. coli* lineages, core-genome single nucleotide polymorphism (SNP) trees were  
553 constructed. A core-genome SNP alignment of the 20 ST101 strains and an additional 65  
554 representative complete *E. coli* genomes (Supplementary Dataset, Table S12) was produced by  
555 parSNP v1.2, implemented in the Harvest suite (Treangen et al. 2014) and aligned against the well-  
556 characterised ExPEC complete genome *E. coli* EC958 reference (Totsika et al. 2011; Forde et al. 2014)  
557 defining 182,264 core SNPs. To integrate the ST101 draft and complete genomes into our  
558 phylogenomic analyses and account for differences between short and long read technologies,  
559 error-free 71-bp paired-end Illumina reads were simulated from the draft assemblies and complete  
560 genomes and used as input to produce a whole genome SNP alignment using Snippy v4.3.5  
561 (<https://github.com/tseemann/snippy.git>) against the ST101 complete genome MS6192. A  
562 pseudogenome of this ST101 SNP alignment was used as input for Gubbins v2.3.1 (Croucher et al.  
563 2015), which detects recombination in closely related groups of isolates. Gubbins was run using  
564 default settings in “raxml mode” generating a phylogenetic tree with a generalized time-reversible  
565 model and gamma correction (GTRGAMMA). This generated a recombination-filtered core-SNP  
566 alignment of 2,106 SNPs. Maximum likelihood (ML) phylogenetic trees were then constructed from  
567 both core-genome SNP-based alignments with RAxML 8.1.15 (Stamatakis 2006) using the

568 GTRGAMMA model and 1000 bootstrap replicates. The resulting ML phylogenetic trees were  
569 visualised using FigTree v1.4.2 (<http://tree.bio.ed.ac.uk/software/figtree/>).

570

571 **Comparative genomics of *E. coli* ST101.** For all *E. coli* ST101 genomes included in this study,  
572 acquired AMR genes were functionally annotated by nucleotide comparisons (a cutoff of 90%  
573 identity over  $\geq 60\%$  query cover) against ResFinder v2.1 (Zankari et al. 2012). O antigen and H  
574 antigen typing were determined using SeroType Finder v1.1 (Joensen et al. 2015) and the EcOH  
575 database (Ingle et al. 2016) within SRST2 (Inouye et al. 2014), with a nucleotide ID threshold of 85%.  
576 Additionally, sequences were screened for the presence of mutations in the QRDR of *gyrA* and *parC*.  
577 For each isolate and the *E. coli* K12 strain MG1655 reference genome (Genbank accession: U00096),  
578 the amino acid sequences of GyrA and ParC were aligned in MEGA v6.06 (Tamura et al. 2013), using  
579 MUSCLE (Edgar 2004) and default parameters. All isolates also underwent *fimH in silico* typing using  
580 FimTyper v1.0 (<https://cge.cbs.dtu.dk/services/FimTyper/>). For plasmid analyses, the plasmid  
581 replicons were detected using PlasmidFinder v1.3 with a nucleotide ID threshold of 90% and the  
582 plasmid Multi-Locus Sequence Typing (pMLST) (*Enterobacteriaceae*) was determined using pMLST  
583 v1.4 (Carattoli et al. 2014). IncC pMLST was determined *in silico* against the four essential IncC genes  
584 *repA*, *parA*, *parB* and *O53* (Hancock et al. 2016). BRIG v.0.95 (Alikhan et al. 2011), EasyFig v2.2.2  
585 (Sullivan et al. 2011) and Phandango v1.1.0 (Hadfield et al. 2018) were used to visually compare the  
586 genomes. Methods for conjugation assays, phenotypic antimicrobial susceptibility testing and  
587 plasmid mating assays can be found in the Supplementary Appendix.

588

589 **Data.** Complete genomes of MS6192 and MS6193, draft genome assemblies and PacBio and  
590 Illumina sequence read data for MS6192, MS6193, MS6194, MS6201, MS6203, MS6204 and  
591 MS6207 are available under the BioProjects: PRJNA580334, PRJNA580336, PRJNA580337,  
592 PRJNA580338, PRJNA580339, PRJNA580341 and PRJNA580340 respectively.

593

594 **Acknowledgements**

595 Author contributions: MMA, BMF, MAS and SAB designed the study. MMA and BMF performed  
596 most of the experiments and data analysis. KMP, MDP, SJH and DLP assisted in clinical/wet-lab  
597 experiments. LWR and SJH assisted in data analysis. KGC, TMC and WFY performed the PacBio  
598 sequencing. Illumina sequencing was performed at the Australian Genome Research Facility (AGRF),  
599 The University of Queensland, Australia. TRW provided the strains. MMA, BMF and SAB wrote the  
600 manuscript. BMF, MAS, MDP, KGC, TRW, DLP and SAB contributed substantial edits. All authors  
601 contributed to the final review and edits.

602

603 **Funding.**

604 This work was supported by grants from the Australian National Health and Medical Research  
605 Council (G1033799) and from the University of Malaya High Impact Research (HIR) Grants (UM-  
606 MOHE HIR Grant UM.C/625/1/HIR/MOHE/CHAN/14/1, Grant No. H-50001-A000027 and FP022-  
607 2018A). MAS is supported by a NHMRC Senior Research Fellowship (G1106930). SAB is supported  
608 by a NHMRC Career Development Fellowship (G1090456). MMA, LWR and SJH were supported by  
609 The Australian Government Research Training Program Scholarship.

610

611 **Conflict of Interest.**

612 None to declare.

## 613 References

- 614 Alikhan NF, Petty NK, Ben Zakour NL, Beatson SA. 2011. BLAST Ring Image Generator (BRIG):  
615 simple prokaryote genome comparisons. *BMC genomics* **12**: 402.
- 616 Alikhan NF, Zhou Z, Sergeant MJ, Achtman M. 2018. A genomic overview of the population  
617 structure of Salmonella. *PLoS Genet* **14**: e1007261.
- 618 Alteri CJ, Mobley HL. 2016. The Versatile Type VI Secretion System. *Microbiology spectrum* **4**.
- 619 Ben Zakour NL, Alsheikh-Hussain AS, Ashcroft MM, Khanh Nhu NT, Roberts LW, Stanton-Cook M,  
620 Schembri MA, Beatson SA. 2016. Sequential Acquisition of Virulence and Fluoroquinolone  
621 Resistance Has Shaped the Evolution of Escherichia coli ST131. *mBio* **7**: e00347-00316.
- 622 Bonnin RA, Poirel L, Carattoli A, Nordmann P. 2012. Characterization of an IncFII plasmid encoding  
623 NDM-1 from Escherichia coli ST131. *PLoS One* **7**: e34752.
- 624 Campos JC, da Silva MJF, dos Santos PRN, Barros EM, Pereira MdO, Seco BMS, Magagnin CM,  
625 Leiroz LK, de Oliveira TGM, de Faria-Júnior C et al. 2015. Characterization of Tn3000, a  
626 Transposon Responsible for bla(NDM-1) Dissemination among Enterobacteriaceae in Brazil,  
627 Nepal, Morocco, and India. *Antimicrobial agents and chemotherapy* **59**: 7387-7395.
- 628 Carattoli A, Zankari E, Garcia-Fernandez A, Voldby Larsen M, Lund O, Villa L, Moller Aarestrup F,  
629 Hasman H. 2014. In silico detection and typing of plasmids using PlasmidFinder and  
630 plasmid multilocus sequence typing. *Antimicrobial agents and chemotherapy* **58**: 3895-  
631 3903.
- 632 Chaisson MJ, Tesler G. 2012. Mapping single molecule sequencing reads using basic local  
633 alignment with successive refinement (BLASR): application and theory. *BMC bioinformatics*  
634 **13**: 238.
- 635 Chin CS, Alexander DH, Marks P, Klammer AA, Drake J, Heiner C, Clum A, Copeland A, Huddleston  
636 J, Eichler EE et al. 2013. Nonhybrid, finished microbial genome assemblies from long-read  
637 SMRT sequencing data. *Nature methods* **10**: 563-569.
- 638 Conlan S, Park M, Deming C, Thomas PJ, Young AC, Coleman H, Sison C, Weingarten RA, Lau AF,  
639 Dekker JP et al. 2016. Plasmid Dynamics in KPC-Positive Klebsiella pneumoniae during  
640 Long-Term Patient Colonization. *mBio* **7**.
- 641 Conlan S, Thomas PJ, Deming C, Park M, Lau AF, Dekker JP, Snitkin ES, Clark TA, Luong K, Song Y et  
642 al. 2014. Single-molecule sequencing to track plasmid diversity of hospital-associated  
643 carbapenemase-producing Enterobacteriaceae. *Science translational medicine* **6**: 254ra126.
- 644 Coque TM, Novais A, Carattoli A, Poirel L, Pitout J, Peixe L, Baquero F, Canton R, Nordmann P.  
645 2008. Dissemination of clonally related Escherichia coli strains expressing extended-  
646 spectrum beta-lactamase CTX-M-15. *Emerging infectious diseases* **14**: 195-200.
- 647 Croucher NJ, Page AJ, Connor TR, Delaney AJ, Keane JA, Bentley SD, Parkhill J, Harris SR. 2015.  
648 Rapid phylogenetic analysis of large samples of recombinant bacterial whole genome  
649 sequences using Gubbins. *Nucleic acids research* **43**: e15.
- 650 Darling AE, Mau B, Perna NT. 2010. progressiveMauve: multiple genome alignment with gene gain,  
651 loss and rearrangement. *PLoS One* **5**: e11147.
- 652 Dhillon BK, Laird MR, Shay JA, Winsor GL, Lo R, Nizam F, Pereira SK, Waglechner N, McArthur AG,  
653 Langille MG et al. 2015. IslandViewer 3: more flexible, interactive genomic island discovery,  
654 visualization and analysis. *Nucleic acids research* **43**: W104-108.
- 655 Diene SM, Rolain JM. 2014. Carbapenemase genes and genetic platforms in Gram-negative bacilli:  
656 Enterobacteriaceae, Pseudomonas and Acinetobacter species. *Clinical microbiology and  
657 infection : the official publication of the European Society of Clinical Microbiology and  
658 Infectious Diseases* **20**: 831-838.

- 659 Djoko KY, Achard MES, Phan MD, Lo AW, Miraula M, Prombhul S, Hancock SJ, Peters KM, Sidjabat  
660 H, Harris PN et al. 2017. Copper ions and coordination complexes as novel carbapenem  
661 adjuvants. *Antimicrobial agents and chemotherapy* doi:10.1128/aac.02280-17.
- 662 Dortet L, Nordmann P, Poirel L. 2012. Association of the emerging carbapenemase NDM-1 with a  
663 bleomycin resistance protein in Enterobacteriaceae and Acinetobacter baumannii.  
664 *Antimicrobial agents and chemotherapy* **56**: 1693-1697.
- 665 Edgar RC. 2004. MUSCLE: a multiple sequence alignment method with reduced time and space  
666 complexity. *BMC bioinformatics* **5**: 113.
- 667 Fernandes MR, McCulloch JA, Vianello MA, Moura Q, Perez-Chaparro PJ, Esposito F, Sartori L,  
668 Dropa M, Matte MH, Lira DP et al. 2016. First Report of the Globally Disseminated IncX4  
669 Plasmid Carrying the mcr-1 Gene in a Colistin-Resistant Escherichia coli Sequence Type 101  
670 Isolate from a Human Infection in Brazil. *Antimicrobial agents and chemotherapy* **60**: 6415-  
671 6417.
- 672 Fiett J, Baraniak A, Izdebski R, Sitkiewicz I, Zabicka D, Meler A, Filczak K, Hryniewicz W,  
673 Gniadkowski M. 2014. The first NDM metallo-beta-lactamase-producing  
674 Enterobacteriaceae isolate in Poland: evolution of IncFII-type plasmids carrying the  
675 bla(NDM-1) gene. *Antimicrobial agents and chemotherapy* **58**: 1203-1207.
- 676 Forde BM, Ben Zakour NL, Stanton-Cook M, Phan MD, Totsika M, Peters KM, Chan KG, Schembri  
677 MA, Upton M, Beatson SA. 2014. The complete genome sequence of Escherichia coli  
678 EC958: a high quality reference sequence for the globally disseminated multidrug resistant  
679 E. coli O25b:H4-ST131 clone. *PLoS One* **9**: e104400.
- 680 Forde BM, Roberts LW, Phan MD, Peters KM, Fleming BA, Russell CW, Lenherr SM, Myers JB,  
681 Barker AP, Fisher MA et al. 2019. Population dynamics of an Escherichia coli ST131 lineage  
682 during recurrent urinary tract infection. *Nature communications* **10**: 3643.
- 683 Hadfield J, Croucher NJ, Goater RJ, Abudahab K, Aanensen DM, Harris SR. 2018. Phandango: an  
684 interactive viewer for bacterial population genomics. *Bioinformatics (Oxford, England)* **34**:  
685 292-293.
- 686 Hancock SJ, Phan MD, Peters KM, Forde BM, Chong TM, Yin WF, Chan KG, Paterson DL, Walsh TR,  
687 Beatson SA et al. 2016. Identification of IncA/C Plasmid Replication and Maintenance  
688 Genes and Development of a Plasmid Multi-Locus Sequence-Typing Scheme. *Antimicrobial  
689 agents and chemotherapy* doi:10.1128/aac.01740-16.
- 690 He S, Chandler M, Varani AM, Hickman AB, Dekker JP, Dyda F. 2016. Mechanisms of Evolution in  
691 High-Consequence Drug Resistance Plasmids. *mBio* **7**.
- 692 Hopkins KL, Davies RH, Threlfall EJ. 2005. Mechanisms of quinolone resistance in Escherichia coli  
693 and Salmonella: recent developments. *International journal of antimicrobial agents* **25**:  
694 358-373.
- 695 Hudson CM, Bent ZW, Meagher RJ, Williams KP. 2014. Resistance determinants and mobile  
696 genetic elements of an NDM-1-encoding Klebsiella pneumoniae strain. *PLoS One* **9**:  
697 e99209.
- 698 Ingle DJ, Levine MM, Kotloff KL, Holt KE, Robins-Browne RM. 2018. Dynamics of antimicrobial  
699 resistance in intestinal Escherichia coli from children in community settings in South Asia  
700 and sub-Saharan Africa. *Nature microbiology* **3**: 1063-1073.
- 701 Ingle DJ, Valcanis M, Kuzevski A, Tauschek M, Inouye M, Stinear T, Levine MM, Robins-Browne RM,  
702 Holt KE. 2016. In silico serotyping of E. coli from short read data identifies limited novel O-  
703 loci but extensive diversity of O: H serotype combinations within and between pathogenic  
704 lineages. *Microbial Genomics* **2**.
- 705 Inouye M, Dashnow H, Raven LA, Schultz MB, Pope BJ, Tomita T, Zobel J, Holt KE. 2014. SRST2:  
706 Rapid genomic surveillance for public health and hospital microbiology labs. *Genome  
707 medicine* **6**: 90.

- 708 Joensen KG, Tetzschner AM, Iguchi A, Aarestrup FM, Scheutz F. 2015. Rapid and Easy In Silico  
709 Serotyping of Escherichia coli Isolates by Use of Whole-Genome Sequencing Data. *Journal*  
710 *of clinical microbiology* **53**: 2410-2426.
- 711 Johnson TJ, Elnekave E, Miller EA, Munoz-Aguayo J, Flores Figueroa C, Johnston B, Nielson DW,  
712 Logue CM, Johnson JR. 2019. Phylogenomic Analysis of Extraintestinal Pathogenic  
713 Escherichia coli Sequence Type 1193, an Emerging Multidrug-Resistant Clonal Group.  
714 *Antimicrobial agents and chemotherapy* **63**.
- 715 Kumarasamy KK, Toleman MA, Walsh TR, Bagaria J, Butt F, Balakrishnan R, Chaudhary U, Doumith  
716 M, Giske CG, Irfan S et al. 2010. Emergence of a new antibiotic resistance mechanism in  
717 India, Pakistan, and the UK: a molecular, biological, and epidemiological study. *The Lancet*  
718 *Infectious diseases* **10**: 597-602.
- 719 Li H, Durbin R. 2009. Fast and accurate short read alignment with Burrows-Wheeler transform.  
720 *Bioinformatics (Oxford, England)* **25**: 1754-1760.
- 721 Mantilla-Calderon D, Jumat MR, Wang T, Ganesan P, Al-Jassim N, Hong PY. 2016. Isolation and  
722 Characterization of NDM-Positive Escherichia coli from Municipal Wastewater in Jeddah,  
723 Saudi Arabia. *Antimicrobial agents and chemotherapy* **60**: 5223-5231.
- 724 Marquez-Ortiz RA, Haggerty L, Olarte N, Duarte C, Garza-Ramos U, Silva-Sanchez J, Castro BE, Sim  
725 EM, Beltran M, Moncada MV et al. 2017. Genomic Epidemiology of NDM-1-Encoding  
726 Plasmids in Latin American Clinical Isolates Reveals Insights into the Evolution of Multidrug  
727 Resistance. *Genome biology and evolution* **9**: 1725-1741.
- 728 Mora A, Blanco M, Lopez C, Mamani R, Blanco JE, Alonso MP, Garcia-Garrote F, Dahbi G, Herrera  
729 A, Fernandez A et al. 2011. Emergence of clonal groups O1:HNM-D-ST59, O15:H1-D-ST393,  
730 O20:H34/HNM-D-ST354, O25b:H4-B2-ST131 and ONT:H21,42-B1-ST101 among CTX-M-14-  
731 producing Escherichia coli clinical isolates in Galicia, northwest Spain. *International journal*  
732 *of antimicrobial agents* **37**: 16-21.
- 733 Moura A, Soares M, Pereira C, Leitao N, Henriques I, Correia A. 2009. INTEGRALL: a database and  
734 search engine for integrons, integrases and gene cassettes. *Bioinformatics (Oxford,*  
735 *England)* **25**: 1096-1098.
- 736 Mushtaq S, Irfan S, Sarma JB, Doumith M, Pike R, Pitout J, Livermore DM, Woodford N. 2011.  
737 Phylogenetic diversity of Escherichia coli strains producing NDM-type carbapenemases.  
738 *The Journal of antimicrobial chemotherapy* **66**: 2002-2005.
- 739 Nordmann P, Poirel L, Walsh TR, Livermore DM. 2011. The emerging NDM carbapenemases.  
740 *Trends in microbiology* **19**: 588-595.
- 741 Oshima K, Toh H, Ogura Y, Sasamoto H, Morita H, Park SH, Ooka T, Iyoda S, Taylor TD, Hayashi T et  
742 al. 2008. Complete genome sequence and comparative analysis of the wild-type  
743 commensal Escherichia coli strain SE11 isolated from a healthy adult. *DNA research : an*  
744 *international journal for rapid publication of reports on genes and genomes* **15**: 375-386.
- 745 Peirano G, Mulvey GL, Armstrong GD, Pitout JD. 2013. Virulence potential and adherence  
746 properties of Escherichia coli that produce CTX-M and NDM beta-lactamases. *Journal of*  
747 *medical microbiology* **62**: 525-530.
- 748 Petty NK, Ben Zakour NL, Stanton-Cook M, Skippington E, Totsika M, Forde BM, Phan MD, Gomes  
749 Moriel D, Peters KM, Davies M et al. 2014. Global dissemination of a multidrug resistant  
750 Escherichia coli clone. *Proceedings of the National Academy of Sciences of the United*  
751 *States of America* **111**: 5694-5699.
- 752 Poirel L, Savov E, Nazli A, Trifonova A, Todorova I, Gergova I, Nordmann P. 2014. Outbreak caused  
753 by NDM-1- and RmtB-producing Escherichia coli in Bulgaria. *Antimicrobial agents and*  
754 *chemotherapy* **58**: 2472-2474.

- 755 Poolman JT, Wacker M. 2016. Extraintestinal Pathogenic Escherichia coli, a Common Human  
756 Pathogen: Challenges for Vaccine Development and Progress in the Field. *The Journal of*  
757 *infectious diseases* **213**: 6-13.
- 758 Price LB, Johnson JR, Aziz M, Clabots C, Johnston B, Tchesnokova V, Nordstrom L, Billig M,  
759 Chattopadhyay S, Stegger M et al. 2013. The epidemic of extended-spectrum-beta-  
760 lactamase-producing Escherichia coli ST131 is driven by a single highly pathogenic  
761 subclone, H30-Rx. *mBio* **4**: e00377-00313.
- 762 Ranjan A, Shaik S, Mondal A, Nandanwar N, Hussain A, Semmler T, Kumar N, Tiwari SK, Jadhav S,  
763 Wieler LH et al. 2016. Molecular Epidemiology and Genome Dynamics of New Delhi  
764 Metallo-beta-Lactamase-Producing Extraintestinal Pathogenic Escherichia coli Strains from  
765 India. *Antimicrobial agents and chemotherapy* **60**: 6795-6805.
- 766 Ren CP, Beatson SA, Parkhill J, Pallen MJ. 2005. The Flag-2 locus, an ancestral gene cluster, is  
767 potentially associated with a novel flagellar system from Escherichia coli. *Journal of*  
768 *bacteriology* **187**: 1430-1440.
- 769 Seemann T. 2014. Prokka: rapid prokaryotic genome annotation. *Bioinformatics* **30**: 2068-2069.
- 770 Siguier P, Perochon J, Lestrade L, Mahillon J, Chandler M. 2006. ISfinder: the reference centre for  
771 bacterial insertion sequences. *Nucleic acids research* **34**: D32-36.
- 772 Stamatakis A. 2006. RAxML-VI-HPC: maximum likelihood-based phylogenetic analyses with  
773 thousands of taxa and mixed models. *Bioinformatics (Oxford, England)* **22**: 2688-2690.
- 774 Su M, Satola SW, Read TD. 2019. Genome-Based Prediction of Bacterial Antibiotic Resistance.  
775 *Journal of clinical microbiology* **57**.
- 776 Sugawara Y, Akeda Y, Sakamoto N, Takeuchi D, Motooka D, Nakamura S, Hagiya H, Yamamoto N,  
777 Nishi I, Yoshida H et al. 2017. Genetic characterization of blaNDM-harboring plasmids in  
778 carbapenem-resistant Escherichia coli from Myanmar. *PLoS One* **12**: e0184720.
- 779 Sullivan MJ, L. BZN, M. FB, Stanton-Cook M, Beatson SA. 2015. Contiguity: Contig adjacency graph  
780 construction and visualisation. *PeerJ PrePrints* **3**: e1273.
- 781 Sullivan MJ, Petty NK, Beatson SA. 2011. Easyfig: a genome comparison visualizer. *Bioinformatics*  
782 *(Oxford, England)* **27**: 1009-1010.
- 783 Tamura K, Stecher G, Peterson D, Filipowski A, Kumar S. 2013. MEGA6: Molecular Evolutionary  
784 Genetics Analysis version 6.0. *Molecular biology and evolution* **30**: 2725-2729.
- 785 Toleman MA, Bugert JJ, Nizam SA. 2015. Extensively drug-resistant New Delhi metallo-beta-  
786 lactamase-encoding bacteria in the environment, Dhaka, Bangladesh, 2012. *Emerging*  
787 *infectious diseases* **21**: 1027-1030.
- 788 Toleman MA, Walsh TR. 2011. Combinatorial events of insertion sequences and ICE in Gram-  
789 negative bacteria. *FEMS microbiology reviews* **35**: 912-935.
- 790 Totsika M, Beatson SA, Sarkar S, Phan MD, Petty NK, Bachmann N, Szubert M, Sidjabat HE,  
791 Paterson DL, Upton M et al. 2011. Insights into a multidrug resistant Escherichia coli  
792 pathogen of the globally disseminated ST131 lineage: genome analysis and virulence  
793 mechanisms. *PLoS One* **6**: e26578.
- 794 Treangen TJ, Ondov BD, Koren S, Phillippy AM. 2014. The Harvest suite for rapid core-genome  
795 alignment and visualization of thousands of intraspecific microbial genomes. *Genome*  
796 *biology* **15**: 524.
- 797 Tsafnat G, Coptly J, Partridge SR. 2011. RAC: Repository of Antibiotic resistance Cassettes.  
798 *Database : the journal of biological databases and curation* **2011**: bar054.
- 799 Varani AM, Siguier P, Gourbeyre E, Charneau V, Chandler M. 2011. ISSaga is an ensemble of web-  
800 based methods for high throughput identification and semi-automatic annotation of  
801 insertion sequences in prokaryotic genomes. *Genome biology* **12**: R30.



- 802 Wailan AM, Paterson DL, Kennedy K, Ingram PR, Bursle E, Sidjabat HE. 2015. Genomic  
803 Characteristics of NDM-Producing Enterobacteriaceae Isolates in Australia and Their  
804 blaNDM Genetic Contexts. *Antimicrobial agents and chemotherapy* **60**: 136-141.
- 805 Walker BJ, Abeel T, Shea T, Priest M, Abouelliel A, Sakthikumar S, Cuomo CA, Zeng Q, Wortman J,  
806 Young SK et al. 2014. Pilon: An Integrated Tool for Comprehensive Microbial Variant  
807 Detection and Genome Assembly Improvement. *PLOS ONE* **9**: e112963.
- 808 Woodford N, Turton JF, Livermore DM. 2011. Multiresistant Gram-negative bacteria: the role of  
809 high-risk clones in the dissemination of antibiotic resistance. *FEMS microbiology reviews*  
810 **35**: 736-755.
- 811 Yamamoto M, Pop-Vicas AE. 2014. Treatment for infections with carbapenem-resistant  
812 Enterobacteriaceae: what options do we still have? *Critical care (London, England)* **18**: 229.
- 813 Yong D, Toleman MA, Giske CG, Cho HS, Sundman K, Lee K, Walsh TR. 2009. Characterization of a  
814 new metallo-beta-lactamase gene, bla(NDM-1), and a novel erythromycin esterase gene  
815 carried on a unique genetic structure in Klebsiella pneumoniae sequence type 14 from  
816 India. *Antimicrobial agents and chemotherapy* **53**: 5046-5054.
- 817 Yoo JS, Kim HM, Koo HS, Yang JW, Yoo JI, Kim HS, Park HK, Lee YS. 2013. Nosocomial transmission  
818 of NDM-1-producing Escherichia coli ST101 in a Korean hospital. *The Journal of*  
819 *antimicrobial chemotherapy* **68**: 2170-2172.
- 820 Zankari E, Hasman H, Cosentino S, Vestergaard M, Rasmussen S, Lund O, Aarestrup FM, Larsen  
821 MV. 2012. Identification of acquired antimicrobial resistance genes. *The Journal of*  
822 *antimicrobial chemotherapy* **67**: 2640-2644.
- 823 Zarrilli R, Pournaras S, Giannouli M, Tsakris A. 2013. Global evolution of multidrug-resistant  
824 Acinetobacter baumannii clonal lineages. *International journal of antimicrobial agents* **41**:  
825 11-19.
- 826 Zheng B, Dong H, Xu H, Lv J, Zhang J, Jiang X, Du Y, Xiao Y, Li L. 2016. Coexistence of MCR-1 and  
827 NDM-1 in Clinical Escherichia coli Isolates. *Clinical infectious diseases : an official*  
828 *publication of the Infectious Diseases Society of America* **63**: 1393-1395.
- 829 Zhong LL, Zhang YF, Doi Y, Huang X, Zhang XF, Zeng KJ, Shen C, Patil S, Xing Y, Zou Y et al. 2017.  
830 Coproduction of MCR-1 and NDM-1 by Colistin-Resistant Escherichia coli Isolated from a  
831 Healthy Individual. *Antimicrobial agents and chemotherapy* **61**.
- 832 Zhou M, Guo Z, Duan Q, Hardwidge PR, Zhu G. 2014. Escherichia coli type III secretion system 2: a  
833 new kind of T3SS? *Veterinary research* **45**: 32.
- 834 Zhou Y, Liang Y, Lynch KH, Dennis JJ, Wishart DS. 2011. PHAST: a fast phage search tool. *Nucleic*  
835 *acids research* **39**: W347-352.
- 836 Zowawi HM, Forde BM, Alfaresi M, Alzarouni A, Farahat Y, Chong TM, Yin WF, Chan KG, Li J,  
837 Schembri MA et al. 2015. Stepwise evolution of pandrug-resistance in Klebsiella  
838 pneumoniae. *Scientific reports* **5**: 15082.
- 839
